# Supplementary material for: microRNAs in Circulation Are Altered in Response to Influenza A Virus Infection in Humans
Source: PLoS One. 2013 Oct 7;8(10):e76811. doi: 10.1371/journal.pone.0076811 (PMC3792094; doi:10.1371/journal.pone.0076811)
Supplement: Table S2 — Top 30% of gene targets regulated by the selected miRNAs. (XLS) [file pone.0076811.s003.xls]

## Sheet: Sheet1
Table S2: Top 30% of gene targets regulated by the selected miRNAs
Score values provide measure of confidence in the target prediction. It ranges from 0 (least confident) to 100 (most confident).
Gene Symbol	MicroRNA	Score Std
A2BP1	hsa-mir-664	50.19
A2BP1	hsa-mir-30a	55.9
ABCD3	hsa-mir-299-5p	50.75
ABHD2	hsa-mir-30a	51.03
ABHD4	hsa-mir-665	55.87
ABL2	hsa-mir-30a	49.74
ACADSB	hsa-mir-26a	48.18
ACCN2	hsa-mir-765	60.49
ACIN1	hsa-mir-765	60.38
ACSL3	hsa-mir-26a	52.15
ACTC1	hsa-mir-30a	49.45
ACTR1A	hsa-mir-30a	52.63
ACVR1B	hsa-mir-1260	63.16
ACVR2A	hsa-mir-1285	58.87
ADAM12	hsa-mir-30a	52.02
ADAMTS6	hsa-mir-30a	49.22
ADCY6	hsa-mir-1260	56.17
ADD3	hsa-mir-18a	51.75
ADRA1D	hsa-mir-30a	49.94
ADRB1	hsa-mir-30a	52.54
AEBP2	hsa-mir-18a	50.12
AFF2	hsa-mir-765	66.4
AFF4	hsa-mir-30a	48.72
AFF4	hsa-mir-576-3p	52.81
AHDC1	hsa-mir-765	76.37
AJAP1	hsa-mir-665	62.16
AKAP5	hsa-mir-765	57.04
AKNA	hsa-mir-664	49.56
ALCAM	hsa-mir-18a	58.01
ALG8	hsa-mir-665	82.44
ALKBH5	hsa-mir-665	67.48
ALKBH8	hsa-mir-1260	51.37
ALKBH8	hsa-mir-18a	57.16
ALS2CR13	hsa-mir-664	51.73
ALS2CR2	hsa-mir-26a	57.34
AMOT	hsa-mir-665	58.49
AMPH	hsa-mir-665	52.08
AMPH	hsa-mir-26a	52.22
ANKRA2	hsa-mir-30a	49.54
ANKRD13B	hsa-mir-665	55.08
ANKRD13C	hsa-mir-665	51.77
ANKRD43	hsa-mir-18a	48.55
ANKRD50	hsa-mir-18a	52.63
ANKRD52	hsa-mir-1285	50.48
ANKRD52	hsa-mir-26a	54.36
ANKRD52	hsa-mir-665	56.66
ANKRD52	hsa-mir-18a	59.48
AP1G1	hsa-mir-576-3p	48.45
AP1G1	hsa-mir-665	49.47
AP1G1	hsa-mir-765	59.8
AP3S1	hsa-mir-30a	54.68
AP3S1	hsa-mir-18a	57.34
APBB2	hsa-mir-1285	49.58
APBB2	hsa-mir-576-3p	51.19
APLP2	hsa-mir-665	64.4
APRIN	hsa-mir-665	55.44
AQP4	hsa-mir-664	51.03
ARF4	hsa-mir-665	52.47
ARF6	hsa-mir-1285	62.43
ARHGAP6	hsa-mir-665	59.93
ARHGEF3	hsa-mir-664	51.39
ARID1A	hsa-mir-765	58.15
ARID2	hsa-mir-765	58.56
ARID4A	hsa-mir-1285	50.55
ARID5B	hsa-mir-576-3p	67.24
ARL3	hsa-mir-1260	49.76
ARL4A	hsa-mir-26a	50.1
ARL4A	hsa-mir-665	63.2
ARL6IP6	hsa-mir-30a	50.76
ARMCX3	hsa-mir-664	49.79
ARNT	hsa-mir-1285	48.63
ARPP-21	hsa-mir-26a	55.22
ARRDC3	hsa-mir-1285	58.08
ASB6	hsa-mir-576-3p	52.2
ASB6	hsa-mir-665	56.75
ASH1L	hsa-mir-1260	56.98
ASPN	hsa-mir-26a	56.21
ASXL2	hsa-mir-18a	51.21
ATG5	hsa-mir-30a	48.32
ATP1B2	hsa-mir-665	52.69
ATP2A2	hsa-mir-30a	48.3
ATP2B1	hsa-mir-1260	55.47
ATP8A1	hsa-mir-30a	50.89
ATP8A1	hsa-mir-18a	53.57
ATP8A1	hsa-mir-1285	54.23
ATPAF1	hsa-mir-18a	51.48
ATRX	hsa-mir-665	54.9
ATXN1	hsa-mir-628-3p	52.38
ATXN1	hsa-mir-18a	52.49
ATXN2	hsa-mir-765	62.35
ATXN2L	hsa-mir-665	51.84
ATXN7L2	hsa-mir-765	54.25
B3GNT5	hsa-mir-30a	52.92
BAAT	hsa-mir-34b	49.88
BACH2	hsa-mir-664	49.06
BACH2	hsa-mir-765	59.68
BAGE4	hsa-mir-665	58.71
BAI3	hsa-mir-576-3p	51.32
BAP1	hsa-mir-664	53.84
BASP1	hsa-mir-1260	53.78
BBC3	hsa-mir-665	67.73
BCDIN3	hsa-mir-765	65.66
BCHE	hsa-mir-576-3p	49.43
BCL11A	hsa-mir-26a	53.73
BCL7B	hsa-mir-26a	51.72
BCOR	hsa-mir-30a	49.27
BCOR	hsa-mir-26a	49.4
BCR	hsa-mir-26a	52.38
BEX1	hsa-mir-18a	53.8
BHLHB2	hsa-mir-26a	50.73
BHLHB5	hsa-mir-18a	54
BLCAP	hsa-mir-665	57.39
BLOC1S2	hsa-mir-26a	58.29
BMPR2	hsa-mir-1285	58.29
BNC2	hsa-mir-30a	49.69
BNC2	hsa-mir-665	61.62
BPGM	hsa-mir-628-3p	49.92
BPTF	hsa-mir-628-3p	50.04
BRD4	hsa-mir-1285	49.7
BRD4	hsa-mir-26a	53.42
BRD4	hsa-mir-765	72.7
BRPF3	hsa-mir-665	60.49
BTBD10	hsa-mir-30a	48.86
BTBD11	hsa-mir-1260	61.28
BTBD14B	hsa-mir-18a	56.39
BTBD5	hsa-mir-34b	48.34
BTBD7	hsa-mir-30a	49.09
BTBD7	hsa-mir-34b	54.18
BTBD7	hsa-mir-664	57.57
BTBD9	hsa-mir-1285	48.21
BTF3L4	hsa-mir-628-3p	49.02
BTRC	hsa-mir-765	51.72
BTRC	hsa-mir-1285	62.52
BZW2	hsa-mir-765	52.85
C10orf22	hsa-mir-1285	51.39
C10orf46	hsa-mir-765	48.52
C10orf56	hsa-mir-30a	59.89
C11orf30	hsa-mir-1260	69.72
C11orf61	hsa-mir-576-3p	51.72
C11orf68	hsa-mir-665	50.22
C13orf18	hsa-mir-30a	52.22
C13orf23	hsa-mir-665	58.1
C14orf109	hsa-mir-664	48.64
C15orf37	hsa-mir-665	61.4
C15orf41	hsa-mir-765	54.84
C16orf58	hsa-mir-765	48.88
C17orf85	hsa-mir-1260	57.97
C19orf22	hsa-mir-664	55.35
C19orf44	hsa-mir-665	54.2
C19orf6	hsa-mir-665	65.32
C1orf113	hsa-mir-765	55.8
C1orf55	hsa-mir-1285	54.73
C1orf55	hsa-mir-665	55.53
C1orf63	hsa-mir-1260	61.67
C1orf69	hsa-mir-1285	57.12
C1orf69	hsa-mir-665	85.73
C20orf112	hsa-mir-1260	51.45
C20orf20	hsa-mir-628-3p	53.67
C20orf23	hsa-mir-30a	53.6
C20orf39	hsa-mir-664	50.21
C20orf44	hsa-mir-1285	53.32
C20orf77	hsa-mir-628-3p	48.97
C21orf51	hsa-mir-30a	49.7
C4orf13	hsa-mir-664	48.52
C6orf68	hsa-mir-30a	50.28
C9orf127	hsa-mir-34b	50.13
C9orf68	hsa-mir-1285	54.75
C9orf74	hsa-mir-30a	52.51
CACNA1G	hsa-mir-765	56.8
CACNA1G	hsa-mir-665	60.77
CACNB3	hsa-mir-18a	58.99
CACNB3	hsa-mir-665	69.29
CACNB3	hsa-mir-765	75.72
CADPS	hsa-mir-30a	50.37
CALM1	hsa-mir-26a	48.54
CAMK2D	hsa-mir-765	60.84
CAMK2N1	hsa-mir-18a	62.57
CAMK2N2	hsa-mir-30a	51.75
CAMK4	hsa-mir-34b	48.72
CAMKV	hsa-mir-1260	54.77
CAMSAP1	hsa-mir-26a	53.01
CAP1	hsa-mir-1260	49.94
CAPN1	hsa-mir-34b	54.9
CAPN3	hsa-mir-665	59.3
CAPN5	hsa-mir-665	52.6
CAPN6	hsa-mir-765	63.9
CAPZA1	hsa-mir-34b	51.07
CASP2	hsa-mir-665	48.14
CASZ1	hsa-mir-26a	59.25
CCDC11	hsa-mir-665	55.99
CCDC28A	hsa-mir-26a	57.61
CCDC6	hsa-mir-26a	49.97
CCDC6	hsa-mir-665	59.68
CCND2	hsa-mir-34b	49.92
CCNK	hsa-mir-30a	50.31
CD2AP	hsa-mir-30a	49.87
CDC25A	hsa-mir-665	57.63
CDC2L6	hsa-mir-18a	52.7
CDC42	hsa-mir-18a	49.34
CDC42BPA	hsa-mir-1260	49.58
CDC42SE1	hsa-mir-665	63.56
CDK2	hsa-mir-18a	49.7
CDRT1	hsa-mir-665	60.16
CELSR3	hsa-mir-30a	48.82
CENTB2	hsa-mir-26a	49.06
CENTG3	hsa-mir-665	57.04
CEP170	hsa-mir-30a	48.64
CEP350	hsa-mir-26a	48.93
CEP57	hsa-mir-18a	50.31
CFL2	hsa-mir-30a	50.37
CHAC1	hsa-mir-26a	56.89
CHD3	hsa-mir-665	58.36
CHD9	hsa-mir-34b	48.27
CHD9	hsa-mir-1285	59.77
CHFR	hsa-mir-26a	58.2
ChGn	hsa-mir-765	49.02
CHIC1	hsa-mir-26a	49.31
CHIC2	hsa-mir-665	54.81
CHKB	hsa-mir-1260	52.26
CHL1	hsa-mir-1285	52.15
CHN2	hsa-mir-26a	49.43
CHN2	hsa-mir-34b	55.6
CHST2	hsa-mir-30a	49.07
CHSY1	hsa-mir-299-5p	52.42
CLASP2	hsa-mir-26a	52.92
CLDND1	hsa-mir-26a	48.21
CLK2	hsa-mir-665	50.01
CLK3	hsa-mir-1285	51.05
CLK3	hsa-mir-665	52.54
CLOCK	hsa-mir-30a	49.88
CMTM4	hsa-mir-30a	50.08
CMTM4	hsa-mir-26a	51.21
CMYA3	hsa-mir-299-5p	49.25
CNOT3	hsa-mir-299-5p	55.58
CNOT6L	hsa-mir-1260	55.08
CNTFR	hsa-mir-765	63.81
CNTN4	hsa-mir-18a	55.04
CNTNAP1	hsa-mir-18a	49.22
COL12A1	hsa-mir-30a	51.77
COL19A1	hsa-mir-26a	52.09
COL1A2	hsa-mir-576-3p	53.32
COL25A1	hsa-mir-30a	53.17
COL4A5	hsa-mir-1285	48.27
COL5A1	hsa-mir-1285	55.74
COLEC12	hsa-mir-765	61.2
COPG2	hsa-mir-665	51.19
COPS7B	hsa-mir-665	53.37
CORO2B	hsa-mir-665	65.18
COX5A	hsa-mir-26a	51.19
CPLX1	hsa-mir-765	62.12
CREB3L2	hsa-mir-765	68.45
CREBBP	hsa-mir-628-3p	52.6
CREBL2	hsa-mir-18a	53.17
CREBL2	hsa-mir-26a	61.67
CRI1	hsa-mir-1285	60.16
CRIM1	hsa-mir-665	59.89
CSMD3	hsa-mir-299-5p	49.04
CSNK1D	hsa-mir-628-3p	57.47
CSNK1G3	hsa-mir-1285	50.58
CSTF3	hsa-mir-1285	63.22
CTDSPL	hsa-mir-18a	52.43
CTDSPL2	hsa-mir-1285	54.32
CTF8	hsa-mir-665	59.73
CTF8	hsa-mir-628-3p	60.07
CTGF	hsa-mir-18a	53.51
CTNNA2	hsa-mir-628-3p	48.63
CUGBP2	hsa-mir-765	56.8
CXorf6	hsa-mir-30a	58.08
CXXC6	hsa-mir-628-3p	52.4
CYGB	hsa-mir-576-3p	50.26
CYP2B6	hsa-mir-1285	65.32
D4S234E	hsa-mir-30a	53.14
DAAM2	hsa-mir-18a	52.43
DACH1	hsa-mir-665	56.59
DAG1	hsa-mir-765	57.2
DAZAP2	hsa-mir-664	50.8
DAZL	hsa-mir-628-3p	49.78
DBC1	hsa-mir-664	50.21
DCAMKL1	hsa-mir-765	50.33
DCDC2	hsa-mir-26a	49.56
DCP1A	hsa-mir-765	63.45
DCTD	hsa-mir-628-3p	50.17
DC-UbP	hsa-mir-18a	49.67
DC-UbP	hsa-mir-1260	52
DCUN1D1	hsa-mir-628-3p	57.52
DDX31	hsa-mir-765	51.03
DDX5	hsa-mir-34b	52.17
DDX6	hsa-mir-34b	53.89
DEDD	hsa-mir-665	51.28
DERL3	hsa-mir-665	68.27
DES	hsa-mir-1260	64.03
DHDDS	hsa-mir-765	62.01
DIAPH1	hsa-mir-299-5p	52.18
DIAPH1	hsa-mir-665	55.83
DICER1	hsa-mir-18a	51.93
DIP2C	hsa-mir-18a	52.47
DKFZP564O0823	hsa-mir-1260	55.4
DKFZp686L1814	hsa-mir-628-3p	49.99
DKFZp686L1814	hsa-mir-18a	53.71
DLG1	hsa-mir-34b	50.31
DLG2	hsa-mir-576-3p	54.75
DLG2	hsa-mir-1260	58.13
DLG3	hsa-mir-765	68.93
DLG5	hsa-mir-628-3p	48.5
DLG5	hsa-mir-30a	48.66
DLG5	hsa-mir-26a	50.46
DMRT3	hsa-mir-26a	55.08
DMRTB1	hsa-mir-664	58.87
DMXL1	hsa-mir-26a	48.97
DMXL1	hsa-mir-664	57.41
DNAJB12	hsa-mir-765	54.32
DNAJC13	hsa-mir-665	59.84
DNAJC7	hsa-mir-765	53.55
DNMT3A	hsa-mir-1260	50.66
DOCK4	hsa-mir-30a	49.61
DOCK9	hsa-mir-576-3p	55.45
DOK6	hsa-mir-665	75.85
DOLPP1	hsa-mir-30a	54.38
DR1	hsa-mir-1285	52.94
DSCR1L1	hsa-mir-665	54.16
DTNA	hsa-mir-664	49.88
DTNA	hsa-mir-665	60.04
DTX1	hsa-mir-765	61.1
DUSP14	hsa-mir-1285	55.42
DUSP19	hsa-mir-1285	58.35
DYNC1I1	hsa-mir-665	50.62
DYRK1A	hsa-mir-576-3p	49.63
DYRK1A	hsa-mir-1260	55.85
E2F3	hsa-mir-665	58.42
ECE2	hsa-mir-1260	52.63
EDARADD	hsa-mir-576-3p	50.82
EDARADD	hsa-mir-1285	64.22
EFNA3	hsa-mir-665	57.99
EFNB1	hsa-mir-665	61.37
EFNB2	hsa-mir-576-3p	53.89
EGR3	hsa-mir-1285	50.49
EHF	hsa-mir-665	48.95
EIF1B	hsa-mir-576-3p	51.66
EIF2C1	hsa-mir-30a	48.7
EIF2C1	hsa-mir-765	49.58
EIF2C1	hsa-mir-664	58.15
EIF2C1	hsa-mir-1260	59.12
EIF4E	hsa-mir-26a	50.08
EIF5	hsa-mir-26a	50.94
EIF5A	hsa-mir-765	55.31
ELAVL3	hsa-mir-30a	50.39
ELAVL3	hsa-mir-1260	58.62
ELF1	hsa-mir-30a	51.63
ELK1	hsa-mir-665	57.47
ELK1	hsa-mir-1260	70.19
ELL2	hsa-mir-30a	50.04
ELN	hsa-mir-299-5p	51.66
ELOVL1	hsa-mir-18a	51.34
EMR4	hsa-mir-665	50.91
ENC1	hsa-mir-30a	50.21
ENSA	hsa-mir-18a	50.08
EPB41L1	hsa-mir-18a	50.31
EPB41L3	hsa-mir-26a	50.39
EPB41L4B	hsa-mir-628-3p	50.82
EPB41L5	hsa-mir-30a	50.13
EPB49	hsa-mir-1285	51.64
EPC2	hsa-mir-26a	48.5
EPHA2	hsa-mir-26a	54.38
ERLIN1	hsa-mir-26a	50.6
ERLIN1	hsa-mir-18a	53.98
ERN2	hsa-mir-576-3p	49.61
ESPN	hsa-mir-30a	50.1
ESR1	hsa-mir-18a	61.08
ESRRA	hsa-mir-765	56.62
ESRRG	hsa-mir-664	49.87
ESRRG	hsa-mir-665	55.2
ETF1	hsa-mir-665	53.41
ETS1	hsa-mir-1260	54.57
ETV1	hsa-mir-1260	49.07
ETV6	hsa-mir-664	53.41
EXT1	hsa-mir-665	54.7
FA2H	hsa-mir-26a	48.75
FAM102A	hsa-mir-765	72.43
FAM120C	hsa-mir-1285	55.6
FAM19A1	hsa-mir-665	53.91
FAM35B	hsa-mir-665	56.5
FAM43A	hsa-mir-30a	51.18
FAM44B	hsa-mir-26a	54.65
FAM46A	hsa-mir-576-3p	50.94
FAM53C	hsa-mir-665	53.82
FAM53C	hsa-mir-1285	55.83
FAM54B	hsa-mir-1285	57.34
FAM54B	hsa-mir-665	65.43
FAM60A	hsa-mir-628-3p	51.45
FAM80B	hsa-mir-665	49.13
FAM8A1	hsa-mir-34b	54.14
FAM98A	hsa-mir-1285	52.79
FASN	hsa-mir-665	48.91
FAT	hsa-mir-26a	52.7
FAT3	hsa-mir-1285	56.06
FBRS	hsa-mir-665	52.69
FBXL10	hsa-mir-1285	56.3
FBXL11	hsa-mir-18a	62.95
FBXL17	hsa-mir-30a	48.48
FBXL19	hsa-mir-665	48.82
FBXL19	hsa-mir-26a	52.49
FBXL20	hsa-mir-30a	49.51
FBXL3	hsa-mir-18a	61.64
FCGRT	hsa-mir-665	58.19
FCHO2	hsa-mir-576-3p	48.86
FGF2	hsa-mir-665	65.07
FGF9	hsa-mir-765	49.38
FGF9	hsa-mir-665	63.43
FLJ10099	hsa-mir-18a	50.12
FLJ10815	hsa-mir-30a	51.46
FLJ10925	hsa-mir-30a	49.36
FLJ20309	hsa-mir-576-3p	48.54
FLJ20309	hsa-mir-18a	49.42
FLJ20309	hsa-mir-665	51.82
FLJ20309	hsa-mir-765	67.98
FLJ20628	hsa-mir-299-5p	52.27
FLJ22313	hsa-mir-1285	50.33
FLJ30058	hsa-mir-765	57.77
FLJ31568	hsa-mir-765	53.21
FLJ31818	hsa-mir-1260	48.7
FLJ31951	hsa-mir-18a	56.46
FLJ36031	hsa-mir-30a	64.58
FLJ36874	hsa-mir-26a	50.51
FLJ45557	hsa-mir-576-3p	48.81
FLJ45557	hsa-mir-18a	53.69
FLJ90652	hsa-mir-1285	50.69
FMNL3	hsa-mir-765	57.99
FNBP1L	hsa-mir-665	59.93
FNDC3A	hsa-mir-576-3p	52.33
FNDC3B	hsa-mir-18a	61.53
FOXG1B	hsa-mir-299-5p	48.97
FOXN3	hsa-mir-765	49.87
FOXN3	hsa-mir-18a	50.01
FOXN3	hsa-mir-1285	54.16
FOXP1	hsa-mir-34b	52.06
FRMD6	hsa-mir-1285	52.11
FRS2	hsa-mir-30a	49.72
FRS2	hsa-mir-18a	56.42
FRY	hsa-mir-628-3p	60.41
FUBP1	hsa-mir-26a	50.42
FUBP3	hsa-mir-30a	48.32
FUT4	hsa-mir-30a	49.27
FXR1	hsa-mir-1260	60.32
FZD4	hsa-mir-664	48.55
FZD5	hsa-mir-665	56.03
G3BP2	hsa-mir-765	53.12
GABRA1	hsa-mir-1285	57.54
GABRA5	hsa-mir-1285	54.7
GABRB2	hsa-mir-664	48.32
GABRB3	hsa-mir-665	52.61
GALNT17	hsa-mir-1260	50.33
GALNT3	hsa-mir-30a	51.99
GAPVD1	hsa-mir-765	53.55
GATAD2B	hsa-mir-1260	72.42
GATAD2B	hsa-mir-765	72.69
GBF1	hsa-mir-765	55.18
GCN1L1	hsa-mir-765	56.73
GCNT2	hsa-mir-30a	54.39
GDF11	hsa-mir-1260	51.34
GDF6	hsa-mir-1260	57.79
GDI1	hsa-mir-1260	48.45
GFRA2	hsa-mir-765	62.86
GLI3	hsa-mir-299-5p	48.98
GLIS3	hsa-mir-576-3p	50.76
GLP1R	hsa-mir-665	58.04
GLRB	hsa-mir-18a	56.06
GM632	hsa-mir-665	56.93
GMFB	hsa-mir-26a	50.84
GNAI1	hsa-mir-664	51.86
GNAI2	hsa-mir-30a	55.47
GNAO1	hsa-mir-665	54.91
GNAS	hsa-mir-18a	48.79
GNAS	hsa-mir-1285	50.24
GNG10	hsa-mir-30a	49.29
GNG2	hsa-mir-665	67.92
GNPNAT1	hsa-mir-1260	50.12
GNPNAT1	hsa-mir-664	64.74
GNS	hsa-mir-34b	49.2
GOLGA1	hsa-mir-34b	48.72
GOLGA1	hsa-mir-299-5p	49.22
GPC3	hsa-mir-765	64.49
GPD2	hsa-mir-34b	55.9
GPIAP1	hsa-mir-665	50.82
GPIAP1	hsa-mir-664	53.5
GPM6A	hsa-mir-628-3p	48.64
GPR110	hsa-mir-30a	54.95
GPR158	hsa-mir-18a	64.03
GPR52	hsa-mir-26a	48.28
GRB10	hsa-mir-26a	57.88
GRHL3	hsa-mir-26a	58.2
GRIA4	hsa-mir-664	56.1
GRINL1A	hsa-mir-26a	48.91
GRK6	hsa-mir-1285	52.65
GRM4	hsa-mir-665	52.42
GUCY1A2	hsa-mir-765	55.94
HAS3	hsa-mir-1260	56.82
HCN4	hsa-mir-1285	53.64
HCP1	hsa-mir-665	62.17
HDAC9	hsa-mir-30a	50.42
HDAC9	hsa-mir-18a	55.42
HECW2	hsa-mir-1285	51.05
HELZ	hsa-mir-26a	57.54
HERC3	hsa-mir-30a	48.72
HIF1A	hsa-mir-18a	62.34
HIP2	hsa-mir-26a	48.45
HLF	hsa-mir-30a	48.54
HLF	hsa-mir-18a	51.52
HMBOX1	hsa-mir-18a	48.97
HMGA1	hsa-mir-26a	64.98
HNT	hsa-mir-765	57.2
HOXA1	hsa-mir-30a	51.11
HOXA1	hsa-mir-665	51.68
HOXA13	hsa-mir-1285	48.37
HOXB5	hsa-mir-665	57.36
HOXC10	hsa-mir-765	64.94
HOXC4	hsa-mir-26a	51.19
HOXC4	hsa-mir-765	61.04
HP1BP3	hsa-mir-665	55.06
HS2ST1	hsa-mir-576-3p	50.13
HSF5	hsa-mir-18a	48.64
ICK	hsa-mir-30a	54.5
ID4	hsa-mir-1285	54.75
IGF1R	hsa-mir-628-3p	48.98
IGF2BP1	hsa-mir-765	51.95
IGF2BP1	hsa-mir-1285	56.14
IGSF4C	hsa-mir-665	51.32
IGSF4D	hsa-mir-18a	52.47
IGSF9B	hsa-mir-18a	50.8
IKZF2	hsa-mir-1285	58.08
IL6ST	hsa-mir-1285	51.86
IL6ST	hsa-mir-1260	53.94
ILF3	hsa-mir-576-3p	49.58
IMPDH1	hsa-mir-665	59.46
INADL	hsa-mir-18a	53.44
ING3	hsa-mir-665	51.32
INOC1	hsa-mir-18a	53.66
INTS2	hsa-mir-576-3p	49.94
IQGAP2	hsa-mir-299-5p	48.81
IQSEC2	hsa-mir-1285	49.24
IRF2	hsa-mir-664	50.78
IRF2	hsa-mir-18a	50.93
IRS1	hsa-mir-30a	48.7
ISL1	hsa-mir-628-3p	48.89
ITGA6	hsa-mir-30a	48.43
ITGB8	hsa-mir-26a	52.69
ITPR3	hsa-mir-628-3p	53.1
ITSN1	hsa-mir-30a	48.91
ITSN1	hsa-mir-1285	51.07
IVNS1ABP	hsa-mir-765	70.08
JAG1	hsa-mir-1285	51.99
JAKMIP2	hsa-mir-26a	50.35
JARID1A	hsa-mir-26a	49.16
JARID2	hsa-mir-26a	58.1
JAZF1	hsa-mir-628-3p	48.63
JMJD1A	hsa-mir-30a	48.73
JMJD1B	hsa-mir-1260	50.6
JPH1	hsa-mir-665	54.43
JPH4	hsa-mir-30a	54.97
KBTBD8	hsa-mir-26a	52.81
KCMF1	hsa-mir-18a	48.32
KCNA1	hsa-mir-18a	50.48
KCNA1	hsa-mir-765	55.88
KCNB1	hsa-mir-1285	52.08
KCNB1	hsa-mir-665	54.29
KCNH7	hsa-mir-18a	50.12
KCNH7	hsa-mir-26a	52.36
KCNJ11	hsa-mir-765	55.69
KCNJ2	hsa-mir-26a	48.37
KCNK2	hsa-mir-1285	55.11
KCNQ4	hsa-mir-26a	54.86
KCTD4	hsa-mir-1285	48.28
KCTD7	hsa-mir-30a	54.39
KCTD9	hsa-mir-30a	48.46
KIAA0152	hsa-mir-665	56.89
KIAA0174	hsa-mir-765	68.5
KIAA0247	hsa-mir-1285	50.67
KIAA0317	hsa-mir-665	66.94
KIAA0323	hsa-mir-665	51.46
KIAA0423	hsa-mir-1285	63.49
KIAA0513	hsa-mir-18a	53.93
KIAA0553	hsa-mir-765	58.02
KIAA0999	hsa-mir-299-5p	49
KIAA0999	hsa-mir-18a	55.38
KIAA1026	hsa-mir-665	50.33
KIAA1211	hsa-mir-665	51.16
KIAA1212	hsa-mir-18a	48.23
KIAA1267	hsa-mir-34b	58.9
KIAA1328	hsa-mir-30a	52.17
KIAA1370	hsa-mir-30a	58.02
KIAA1468	hsa-mir-26a	51.19
KIAA1486	hsa-mir-664	49.06
KIAA1598	hsa-mir-26a	52.06
KIAA1622	hsa-mir-30a	51.05
KIAA1737	hsa-mir-26a	49.61
KIAA1967	hsa-mir-665	56.35
KIAA2022	hsa-mir-628-3p	52.2
KIAA2022	hsa-mir-1260	60.77
KIF21B	hsa-mir-665	66.02
KIF26B	hsa-mir-664	49.97
KIRREL	hsa-mir-665	66.65
KIT	hsa-mir-18a	65.03
KITLG	hsa-mir-299-5p	58.38
KLF12	hsa-mir-1285	48.72
KLF12	hsa-mir-628-3p	49.27
KLF12	hsa-mir-26a	50.51
KLF9	hsa-mir-30a	48.77
KLHDC5	hsa-mir-26a	58.26
KLHL18	hsa-mir-26a	52.18
KLHL20	hsa-mir-18a	54.75
KPNA1	hsa-mir-628-3p	52.99
KPNA6	hsa-mir-18a	50.37
KPNA6	hsa-mir-1260	60.34
KPNA6	hsa-mir-26a	64.33
KRAS	hsa-mir-628-3p	68.19
KREMEN1	hsa-mir-30a	48.5
KRTHA5	hsa-mir-665	69.33
KRTHA6	hsa-mir-665	55.02
Kua	hsa-mir-26a	54.43
LARP2	hsa-mir-1260	48.14
LASP1	hsa-mir-665	52.43
LAT	hsa-mir-18a	49.06
LCOR	hsa-mir-1285	49.61
LDLRAD2	hsa-mir-1285	49.34
LDLRAD2	hsa-mir-665	51.41
LEMD3	hsa-mir-18a	52.76
LHX8	hsa-mir-1285	64.73
LIMD1	hsa-mir-1285	70.04
LIMK1	hsa-mir-1260	71.88
LIN10	hsa-mir-26a	50.35
LIN28B	hsa-mir-26a	52.36
LMAN2	hsa-mir-1285	50.48
LMLN	hsa-mir-30a	50.57
LMO4	hsa-mir-18a	49.04
LOC100113407	hsa-mir-18a	48.25
LOC130951	hsa-mir-30a	57.18
LOC150786	hsa-mir-765	73.58
LOC153222	hsa-mir-26a	49.92
LOC162427	hsa-mir-765	58.33
LOC203547	hsa-mir-18a	65.28
LOC339745	hsa-mir-765	59.12
LOC387856	hsa-mir-665	75.72
LOC399947	hsa-mir-18a	48.19
LOC399947	hsa-mir-765	70.76
LOC440093	hsa-mir-30a	51.57
LOC440138	hsa-mir-765	49.88
LOC51334	hsa-mir-628-3p	54.54
LOC619208	hsa-mir-18a	54.02
LOC643751	hsa-mir-18a	50.13
LOC729830	hsa-mir-26a	56.06
LOC90355	hsa-mir-18a	52.6
LOXL1	hsa-mir-1285	53.67
LRBA	hsa-mir-576-3p	54.23
LRCH2	hsa-mir-30a	53.89
LRFN2	hsa-mir-30a	49.79
LRP2	hsa-mir-664	59.21
LRP4	hsa-mir-765	68.5
LRRC16	hsa-mir-26a	59.37
LRRC8A	hsa-mir-765	67.01
LRRN3	hsa-mir-765	48.52
LRRTM3	hsa-mir-1285	56.33
LSM14B	hsa-mir-18a	50.66
LSS	hsa-mir-576-3p	48.39
LUC7L2	hsa-mir-628-3p	49.06
LUZP1	hsa-mir-665	52.87
LYST	hsa-mir-34b	48.54
MAB21L1	hsa-mir-26a	51.19
MAB21L2	hsa-mir-765	55.31
MACF1	hsa-mir-665	56.89
MAMDC1	hsa-mir-299-5p	54.54
MAMDC2	hsa-mir-628-3p	49.2
MAN1A2	hsa-mir-30a	49.85
MAN2A1	hsa-mir-26a	50.03
MAP1A	hsa-mir-1285	49.15
MAP1A	hsa-mir-765	60.47
MAP2	hsa-mir-26a	50.53
MAP3K3	hsa-mir-765	55.58
MAP3K5	hsa-mir-30a	48.77
MAP4K5	hsa-mir-664	56.66
MAP6	hsa-mir-30a	51.88
MAPK1	hsa-mir-665	50.17
MAPK10	hsa-mir-765	58.29
MAPRE1	hsa-mir-34b	52.97
MARCKS	hsa-mir-34b	52.88
MARCKSL1	hsa-mir-1285	48.79
MARK1	hsa-mir-26a	48.45
MARK1	hsa-mir-30a	51.46
MAT2A	hsa-mir-299-5p	57.16
MAT2A	hsa-mir-765	60.61
MBNL1	hsa-mir-18a	49.15
MBNL2	hsa-mir-664	53.12
MDGA1	hsa-mir-18a	62.05
MDM2	hsa-mir-1285	54.07
MECP2	hsa-mir-26a	57.12
MECP2	hsa-mir-1260	57.18
MEF2C	hsa-mir-1285	54.73
MEF2C	hsa-mir-18a	59.57
MEF2D	hsa-mir-765	54.66
METAP2	hsa-mir-26a	53.28
MEX3A	hsa-mir-1260	52.83
MEX3A	hsa-mir-665	55.38
MGA	hsa-mir-665	72.15
MGC13024	hsa-mir-18a	65.35
MGC20255	hsa-mir-30a	58.42
MGC4268	hsa-mir-665	57.75
MIB1	hsa-mir-26a	57.63
MID1IP1	hsa-mir-1260	54.93
MIER3	hsa-mir-1285	49.94
MIER3	hsa-mir-34b	50.44
MIPOL1	hsa-mir-628-3p	50.75
MKRN3	hsa-mir-30a	52.11
MLLT7	hsa-mir-664	61.19
MMD	hsa-mir-30a	48.57
MMP16	hsa-mir-664	55.08
MMP16	hsa-mir-1285	55.72
MMP24	hsa-mir-34b	60.92
MOCS1	hsa-mir-665	54.09
MPL	hsa-mir-664	52.67
MRAS	hsa-mir-34b	48.77
MRAS	hsa-mir-26a	51.68
MSI1	hsa-mir-576-3p	50.04
MSL-1	hsa-mir-34b	49.34
MST150	hsa-mir-1285	54.39
MST4	hsa-mir-664	48.77
MSTO1	hsa-mir-1260	50.53
MTA1	hsa-mir-30a	53.19
MTMR4	hsa-mir-665	50.91
MTMR4	hsa-mir-765	63.83
MYBL2	hsa-mir-30a	53.37
MYBPC1	hsa-mir-1285	51.27
MYH10	hsa-mir-26a	63.34
MYLK	hsa-mir-18a	52.04
MYST3	hsa-mir-665	60.83
NAP5	hsa-mir-34b	50.19
NARG1	hsa-mir-576-3p	49.76
NAV1	hsa-mir-1260	48.16
NAV1	hsa-mir-1285	55
NAV1	hsa-mir-665	68.3
NCAM1	hsa-mir-30a	49.49
NCAM1	hsa-mir-665	67.3
NCOA6	hsa-mir-628-3p	51.46
NCOR2	hsa-mir-30a	52.33
NDE1	hsa-mir-765	59.84
NDEL1	hsa-mir-18a	54.27
NDEL1	hsa-mir-665	69.29
NDFIP1	hsa-mir-18a	48.55
NDUFAB1	hsa-mir-34b	49.81
NDUFS1	hsa-mir-18a	51.39
NEDD8	hsa-mir-1285	48.21
NEDD8	hsa-mir-665	70.44
NEDD9	hsa-mir-18a	55.35
NEGR1	hsa-mir-628-3p	49.36
NEK9	hsa-mir-34b	48.77
NEO1	hsa-mir-18a	59.71
NEUROD6	hsa-mir-628-3p	48.75
NFIB	hsa-mir-30a	50.35
NFIB	hsa-mir-665	50.73
NFIB	hsa-mir-664	57.16
NFIB	hsa-mir-1260	57.83
NFIB	hsa-mir-765	62.34
NFIX	hsa-mir-765	69.85
NHS	hsa-mir-26a	53.37
NHS	hsa-mir-1260	66.65
NID1	hsa-mir-26a	52.26
NIPBL	hsa-mir-665	50.67
NLGN4X	hsa-mir-1285	51.66
NLK	hsa-mir-665	81.19
NLN	hsa-mir-664	52.88
NME7	hsa-mir-665	52.99
NNAT	hsa-mir-665	55.69
N-PAC	hsa-mir-1285	52.24
NPAS4	hsa-mir-1260	48.91
NPLOC4	hsa-mir-1285	52.78
NPLOC4	hsa-mir-299-5p	60.13
NR2E1	hsa-mir-664	51.77
NR3C1	hsa-mir-18a	62.57
NR4A3	hsa-mir-665	54.02
NR4A3	hsa-mir-1260	54.99
NR5A2	hsa-mir-1285	48.68
NRIP1	hsa-mir-34b	48.77
NRIP1	hsa-mir-765	57.32
NRK	hsa-mir-30a	50.66
NRN1	hsa-mir-765	52.72
NRP1	hsa-mir-1285	53.55
NRXN2	hsa-mir-1260	52.04
NSFL1C	hsa-mir-765	51.27
NTRK3	hsa-mir-30a	50.13
NTRK3	hsa-mir-765	51.46
NUDT11	hsa-mir-26a	52.78
NUFIP2	hsa-mir-765	63.59
NUTF2	hsa-mir-765	69.67
ODZ1	hsa-mir-1285	51.27
ODZ3	hsa-mir-665	51.91
OGT	hsa-mir-665	55.38
OMG	hsa-mir-765	49.69
ONECUT1	hsa-mir-34b	48.14
ONECUT2	hsa-mir-665	64.29
ORC2L	hsa-mir-30a	55.09
OSBPL3	hsa-mir-30a	56.32
OSBPL6	hsa-mir-664	56.12
OTUD4	hsa-mir-26a	51.52
P15RS	hsa-mir-665	54.56
P18SRP	hsa-mir-665	51.61
PABPN1	hsa-mir-1260	60.66
PAFAH1B1	hsa-mir-665	49.31
PAFAH1B1	hsa-mir-1285	52.88
PAIP1	hsa-mir-628-3p	48.37
PALM	hsa-mir-665	68.05
PAPOLA	hsa-mir-30a	49.52
PAPPA	hsa-mir-18a	48.46
PAX2	hsa-mir-26a	50.58
PAX2	hsa-mir-765	56.3
PAX2	hsa-mir-665	59.57
PAX9	hsa-mir-665	63.63
PCDH1	hsa-mir-765	54.11
PCDH10	hsa-mir-30a	49.99
PCDH11X	hsa-mir-1285	49.4
PCDH11X	hsa-mir-34b	53.35
PCDH11Y	hsa-mir-1285	53.96
PCDH17	hsa-mir-665	56.68
PCDH18	hsa-mir-26a	55.02
PCDH9	hsa-mir-26a	50.87
PCDHAC1	hsa-mir-765	67.01
PCDHGC3	hsa-mir-1285	48.23
PCDHGC3	hsa-mir-765	57.3
PCGF2	hsa-mir-18a	53.89
PCGF4	hsa-mir-30a	58.27
PCNX	hsa-mir-26a	53.44
PCTK1	hsa-mir-1260	53.14
PDE4D	hsa-mir-18a	63.31
PDGFA	hsa-mir-765	55.33
PDHX	hsa-mir-26a	56.91
PDIK1L	hsa-mir-26a	52.18
PDPK1	hsa-mir-34b	49.06
PDZD2	hsa-mir-576-3p	57.83
PERLD1	hsa-mir-765	58.56
PERQ1	hsa-mir-30a	50.75
PERQ1	hsa-mir-18a	64.01
PHC3	hsa-mir-18a	53.48
PHF1	hsa-mir-665	50.98
PHF15	hsa-mir-765	48.81
PHF17	hsa-mir-664	50.04
PHF19	hsa-mir-18a	59.41
PHF2	hsa-mir-18a	54.32
PHF21A	hsa-mir-34b	53.42
PHF21A	hsa-mir-26a	56.05
PHF8	hsa-mir-665	60.54
PHLDB2	hsa-mir-26a	48.81
PHOSPHO1	hsa-mir-665	53.94
PHTF2	hsa-mir-26a	48.19
PHTF2	hsa-mir-30a	49.25
PI4KII	hsa-mir-1260	61.44
PIP5K1A	hsa-mir-1260	54.03
PITPNA	hsa-mir-765	48.28
PITPNM2	hsa-mir-30a	51.73
PLAG1	hsa-mir-30a	48.5
PLAGL2	hsa-mir-665	51.82
PLCB1	hsa-mir-26a	51.25
PLCG1	hsa-mir-765	48.54
PLCXD3	hsa-mir-1260	50.31
PLCXD3	hsa-mir-34b	52.83
PLEKHA7	hsa-mir-30a	50.48
PLEKHG1	hsa-mir-628-3p	54.95
PLP1	hsa-mir-26a	52.45
PLP2	hsa-mir-665	57.93
PLS3	hsa-mir-765	62.32
PLXND1	hsa-mir-26a	53.93
PNKD	hsa-mir-664	53.51
PNKD	hsa-mir-765	64.85
POGZ	hsa-mir-299-5p	51.59
POLR3H	hsa-mir-665	48.77
POLS	hsa-mir-299-5p	48.16
POU2F2	hsa-mir-665	65.84
POU2F2	hsa-mir-765	80.9
POU3F1	hsa-mir-665	54.16
POU3F1	hsa-mir-1260	58.78
POU3F2	hsa-mir-664	48.57
POU6F1	hsa-mir-18a	52.27
PPM1B	hsa-mir-34b	49.7
PPM1E	hsa-mir-30a	51.28
PPP1R12B	hsa-mir-765	71.9
PPP1R2	hsa-mir-299-5p	50.67
PPP1R8	hsa-mir-665	50.57
PPP1R8	hsa-mir-1260	63.45
PPP2R2A	hsa-mir-665	69.6
PPP2R2B	hsa-mir-1285	50.37
PPP2R5A	hsa-mir-299-5p	60.25
PPP2R5E	hsa-mir-576-3p	51.93
PPP3CB	hsa-mir-1285	52.9
PRG-3	hsa-mir-765	63.72
PRG4	hsa-mir-30a	57.7
PRKAA2	hsa-mir-26a	49.69
PRKAG2	hsa-mir-576-3p	58.89
PRKCB1	hsa-mir-26a	55.36
PRKCD	hsa-mir-26a	60.54
PRKCQ	hsa-mir-26a	49.76
PRKRIR	hsa-mir-30a	49.78
PRLR	hsa-mir-30a	52.88
ProSAPiP1	hsa-mir-765	53.51
PSCD3	hsa-mir-665	56.15
PSD3	hsa-mir-18a	52.83
PSEN1	hsa-mir-576-3p	51.03
PSME3	hsa-mir-30a	48.5
PTBP2	hsa-mir-1260	63.4
PTEN	hsa-mir-1285	51
PTEN	hsa-mir-26a	52.65
PTEN	hsa-mir-628-3p	57.41
PTER	hsa-mir-26a	51.63
PTGFRN	hsa-mir-18a	51.66
PTGS2	hsa-mir-576-3p	58.58
PTK9	hsa-mir-18a	54.68
PTP4A1	hsa-mir-26a	56.19
PTPLAD1	hsa-mir-34b	49.56
PTPN3	hsa-mir-765	60.49
PTPRD	hsa-mir-26a	51.25
PTPRK	hsa-mir-1260	59.23
PURB	hsa-mir-34b	51.32
PURB	hsa-mir-18a	53.76
PVRL1	hsa-mir-665	56.84
PYGO2	hsa-mir-665	48.64
QKI	hsa-mir-576-3p	48.41
QKI	hsa-mir-765	52.35
R3HDM1	hsa-mir-30a	55.78
RAB11FIP1	hsa-mir-26a	50.26
RAB11FIP2	hsa-mir-18a	50.57
RAB2	hsa-mir-765	64.47
RAB21	hsa-mir-26a	50.53
RAB23	hsa-mir-30a	49.6
RAB3IP	hsa-mir-26a	50.26
RAB4B	hsa-mir-30a	51.55
RAB5A	hsa-mir-18a	54.3
RAB5C	hsa-mir-765	52.67
RAB6A	hsa-mir-765	70.73
RAB6B	hsa-mir-1260	51.25
RAB6B	hsa-mir-765	62.07
RAB8A	hsa-mir-30a	49.96
RAD21	hsa-mir-665	50.8
RAD51L1	hsa-mir-665	57.47
RAD51L1	hsa-mir-18a	68.01
RAD9B	hsa-mir-30a	48.28
RALA	hsa-mir-665	50.08
RALY	hsa-mir-1285	53.58
RANBP10	hsa-mir-26a	48.52
RAP2B	hsa-mir-576-3p	48.36
RAP2B	hsa-mir-1260	53.67
RAPH1	hsa-mir-665	59.75
RARA	hsa-mir-576-3p	53.55
RARB	hsa-mir-665	58.17
RARB	hsa-mir-1285	60.74
RARG	hsa-mir-765	50.01
RARG	hsa-mir-30a	55.63
RASD1	hsa-mir-30a	51.02
RASGEF1B	hsa-mir-1285	52.27
RASGEF1B	hsa-mir-665	58.78
RASIP1	hsa-mir-1260	50.93
RBBP8	hsa-mir-18a	55.17
RBM12	hsa-mir-664	57.61
RBM15B	hsa-mir-30a	48.88
RBM15B	hsa-mir-665	56.6
RBM24	hsa-mir-26a	53.48
RBM33	hsa-mir-576-3p	49.34
RBPMS	hsa-mir-576-3p	50.89
RC3H1	hsa-mir-1285	51.59
RCOR1	hsa-mir-30a	52.13
RECK	hsa-mir-30a	49.04
RFP2	hsa-mir-30a	48.73
RFX5	hsa-mir-299-5p	54.45
RFXDC1	hsa-mir-30a	52.11
RGS2	hsa-mir-30a	50.44
RHOQ	hsa-mir-26a	48.66
RHOQ	hsa-mir-1285	51.64
RICTOR	hsa-mir-34b	50.17
RIMS1	hsa-mir-1285	58.31
RIMS2	hsa-mir-18a	48.19
RIMS2	hsa-mir-576-3p	52.81
RIMS4	hsa-mir-1285	52.17
RIMS4	hsa-mir-665	57.14
RIPK5	hsa-mir-30a	50.96
RLF	hsa-mir-1260	55.44
RNF10	hsa-mir-1260	50.84
RNF138	hsa-mir-30a	48.45
RNF146	hsa-mir-1260	52.27
RNF146	hsa-mir-30a	52.4
RNF207	hsa-mir-665	55.49
RNF207	hsa-mir-1285	58.49
ROBO1	hsa-mir-299-5p	48.72
RPRC1	hsa-mir-18a	55.26
RPS29	hsa-mir-1285	51.52
RPS6KB1	hsa-mir-628-3p	54.41
RSBN1	hsa-mir-628-3p	51.99
RSPO3	hsa-mir-1285	53.41
RTN4R	hsa-mir-30a	50.06
RUNX1	hsa-mir-30a	49.6
RUNX1T1	hsa-mir-765	48.68
RWDD4A	hsa-mir-30a	52.96
RYBP	hsa-mir-1260	48.16
SAMD12	hsa-mir-26a	53.75
SAR1A	hsa-mir-1285	53.46
SAR1A	hsa-mir-18a	56.12
SCARF1	hsa-mir-1285	51.59
SEC14L2	hsa-mir-664	54.34
SEC14L3	hsa-mir-18a	52.49
SEC23A	hsa-mir-628-3p	50.91
SEC63	hsa-mir-1285	58.96
SEH1L	hsa-mir-1285	53.48
SEH1L	hsa-mir-765	79.21
SEMA4C	hsa-mir-665	67.33
SEMA6A	hsa-mir-765	70.26
SEPHS1	hsa-mir-34b	51.02
SETD7	hsa-mir-1260	49.4
SFRS2B	hsa-mir-665	49.56
SFRS4	hsa-mir-665	62.95
SFRS5	hsa-mir-1260	53.62
SFRS7	hsa-mir-299-5p	51.86
SGCB	hsa-mir-30a	49.96
SGCD	hsa-mir-628-3p	53.33
SH2D2A	hsa-mir-665	65.1
SH2D2A	hsa-mir-765	66.27
SH3BP4	hsa-mir-18a	48.89
SH3KBP1	hsa-mir-18a	60.59
SH3PXD2A	hsa-mir-30a	48.81
SH3PXD2A	hsa-mir-26a	50.67
SHANK2	hsa-mir-665	59.44
SHC1	hsa-mir-665	55.56
SIKE	hsa-mir-576-3p	52.47
SIN3A	hsa-mir-576-3p	48.45
SIN3A	hsa-mir-628-3p	58.04
SIPA1L2	hsa-mir-665	56.59
SIX3	hsa-mir-765	87.12
SLC11A1	hsa-mir-765	53.19
SLC12A6	hsa-mir-18a	54.72
SLC12A6	hsa-mir-576-3p	54.82
SLC1A1	hsa-mir-26a	51.93
SLC24A3	hsa-mir-765	55.35
SLC25A16	hsa-mir-26a	50.15
SLC26A9	hsa-mir-1285	50.71
SLC2A4RG	hsa-mir-576-3p	54.54
SLC31A1	hsa-mir-665	57.5
SLC35F3	hsa-mir-30a	48.54
SLC38A2	hsa-mir-26a	54
SLC39A10	hsa-mir-664	50.13
SLC39A10	hsa-mir-765	55.26
SLC41A2	hsa-mir-30a	58.1
SLC4A7	hsa-mir-26a	50.98
SLC5A3	hsa-mir-628-3p	62.28
SLC8A1	hsa-mir-628-3p	49.33
SLC8A1	hsa-mir-576-3p	50.94
SLCO5A1	hsa-mir-1285	51.12
SLIT2	hsa-mir-664	54.03
SLITRK6	hsa-mir-576-3p	48.7
SMAD1	hsa-mir-26a	52.54
SMAD2	hsa-mir-18a	53.01
SMAD2	hsa-mir-30a	56.08
SMAD6	hsa-mir-1285	52.58
SMAD7	hsa-mir-665	64.06
SMAP1L	hsa-mir-18a	50.75
SMARCA4	hsa-mir-765	65
SMARCAD1	hsa-mir-1285	65.07
SMARCD1	hsa-mir-1260	50.17
SMARCD1	hsa-mir-1285	52.83
SMARCD2	hsa-mir-665	53.32
SMCX	hsa-mir-665	63.04
SMCX	hsa-mir-765	74.77
SMURF1	hsa-mir-34b	50.35
SNAG1	hsa-mir-30a	50.19
SNAP25	hsa-mir-664	53.46
SNCA	hsa-mir-1285	61.35
SNN	hsa-mir-26a	55.45
SNRK	hsa-mir-18a	49.51
SNTA1	hsa-mir-765	62.53
SNURF	hsa-mir-18a	52.27
SNURF	hsa-mir-765	58.4
SNX1	hsa-mir-664	57.16
SNX11	hsa-mir-665	65.73
SNX21	hsa-mir-665	54.68
SOCS1	hsa-mir-665	58.99
SOCS5	hsa-mir-18a	62.5
SORBS2	hsa-mir-18a	54.23
SOX11	hsa-mir-765	52.18
SOX11	hsa-mir-34b	56.48
SOX4	hsa-mir-576-3p	48.88
SOX4	hsa-mir-299-5p	53.93
SP1	hsa-mir-18a	50.4
SP2	hsa-mir-1285	48.46
SP2	hsa-mir-765	62.55
SP4	hsa-mir-30a	50.17
SPEN	hsa-mir-1285	50.58
SPIRE1	hsa-mir-628-3p	52.38
SPOCK2	hsa-mir-26a	55.83
SPRY2	hsa-mir-1260	49.7
SPSB4	hsa-mir-664	49.97
SPTBN1	hsa-mir-26a	63.95
SPTBN4	hsa-mir-765	64.62
SR140	hsa-mir-1260	53.42
SRCAP	hsa-mir-26a	54.59
SRGAP1	hsa-mir-26a	50.04
SRPR	hsa-mir-1285	56.6
SRRM1	hsa-mir-1285	50.28
SRRM2	hsa-mir-1260	57.68
SS18	hsa-mir-1285	51.97
SSR3	hsa-mir-1260	61.58
SSX2IP	hsa-mir-26a	49.61
ST18	hsa-mir-26a	50.67
ST18	hsa-mir-18a	51.19
ST7L	hsa-mir-1285	62.59
ST8SIA2	hsa-mir-664	51.39
ST8SIA4	hsa-mir-18a	48.64
STAC	hsa-mir-30a	48.46
STAT3	hsa-mir-665	56.8
STEAP4	hsa-mir-765	60.88
STIM2	hsa-mir-30a	49.79
STK24	hsa-mir-18a	61.8
STK24	hsa-mir-765	68.64
STK35	hsa-mir-765	57.86
STK39	hsa-mir-30a	53.05
STK39	hsa-mir-299-5p	54.52
STK4	hsa-mir-1285	51.21
STMN4	hsa-mir-1260	57.27
STRBP	hsa-mir-26a	53.8
STX12	hsa-mir-30a	49.13
SULF1	hsa-mir-26a	53.1
SUMO1	hsa-mir-665	53.08
SYN1	hsa-mir-665	55.02
SYN1	hsa-mir-765	63.58
SYNGR3	hsa-mir-18a	49.7
SYNJ1	hsa-mir-628-3p	50.85
SYNJ1	hsa-mir-765	63.43
SYPL2	hsa-mir-765	67.69
SYT11	hsa-mir-576-3p	48.19
SYT11	hsa-mir-765	55.2
TAB3	hsa-mir-30a	55.4
TAF5L	hsa-mir-18a	48.61
TAF5L	hsa-mir-665	59.5
TAIP-2	hsa-mir-18a	53.41
TANC2	hsa-mir-26a	52.67
TANC2	hsa-mir-1285	58.62
TANC2	hsa-mir-765	66.13
TAOK3	hsa-mir-765	56.37
TAPT1	hsa-mir-576-3p	52.61
TARDBP	hsa-mir-1260	57.45
TARP	hsa-mir-765	63.83
TBC1D13	hsa-mir-665	57.52
TBPL1	hsa-mir-18a	53.42
TCAP	hsa-mir-1285	54.41
TCF12	hsa-mir-1285	57.52
TCF20	hsa-mir-1260	70.69
TCF4	hsa-mir-765	61.8
TCF7	hsa-mir-628-3p	57.86
TCF7L1	hsa-mir-1285	56.78
TEAD1	hsa-mir-299-5p	49.63
TEAD1	hsa-mir-1285	50.53
TEF	hsa-mir-1260	50.35
TFAP2A	hsa-mir-628-3p	49.61
TFAP2A	hsa-mir-1285	66
TFDP1	hsa-mir-30a	49.43
THAP11	hsa-mir-765	56.46
THBS1	hsa-mir-18a	55.38
THEX1	hsa-mir-18a	51.88
THRAP1	hsa-mir-1260	51.12
THRAP2	hsa-mir-664	50.71
TIPARP	hsa-mir-1260	52.17
TLE4	hsa-mir-765	57.99
TLE4	hsa-mir-665	61.92
TLK2	hsa-mir-765	57.38
TLL1	hsa-mir-18a	51.32
TLOC1	hsa-mir-664	50.01
TMCC1	hsa-mir-30a	49.97
TMEM113	hsa-mir-30a	49.34
TMEM113	hsa-mir-18a	53.48
TMEM155	hsa-mir-576-3p	52.7
TMEM16D	hsa-mir-30a	53.26
TMEM2	hsa-mir-26a	56.33
TMEM23	hsa-mir-576-3p	48.18
TMEM23	hsa-mir-34b	56.6
TMEM24	hsa-mir-26a	48.32
TMEM26	hsa-mir-34b	49.27
TMEM28	hsa-mir-1285	57.07
TMEM32	hsa-mir-30a	54.54
TMTC2	hsa-mir-299-5p	50.64
TNFRSF21	hsa-mir-1285	48.79
TNKS	hsa-mir-30a	56.91
TNPO1	hsa-mir-26a	51.11
TNRC15	hsa-mir-30a	56.6
TNRC4	hsa-mir-30a	60.52
TNRC6B	hsa-mir-34b	49.04
TNRC6B	hsa-mir-1285	49.24
TOMM40L	hsa-mir-665	57.56
TOP1	hsa-mir-576-3p	53.35
TOR2A	hsa-mir-765	70.82
TOX2	hsa-mir-1285	49.67
TPM3	hsa-mir-765	58.9
TRAM1	hsa-mir-26a	51.55
TRIM2	hsa-mir-18a	49.65
TRIM23	hsa-mir-628-3p	49.52
TRIM33	hsa-mir-665	53.39
TRIM8	hsa-mir-18a	51.73
TRIOBP	hsa-mir-18a	57.75
TRPC4	hsa-mir-18a	56.41
TRPS1	hsa-mir-628-3p	49.67
TTC14	hsa-mir-1260	54.05
TXNDC4	hsa-mir-299-5p	49.43
TXNL1	hsa-mir-665	57.02
UBE2D1	hsa-mir-26a	48.43
UBE2E1	hsa-mir-1260	54.23
UBE2G1	hsa-mir-30a	58.54
UBE3A	hsa-mir-664	49.96
UBE3C	hsa-mir-30a	53.96
UBE4B	hsa-mir-26a	50.28
UBN1	hsa-mir-30a	49.18
ULK2	hsa-mir-26a	52.24
UNC5A	hsa-mir-765	49.43
UNQ9433	hsa-mir-628-3p	55.74
UPP2	hsa-mir-665	55
USP24	hsa-mir-18a	49.22
USP37	hsa-mir-1285	49.11
USP53	hsa-mir-299-5p	49.43
UTP11L	hsa-mir-665	51.09
UTX	hsa-mir-576-3p	52.92
VAMP1	hsa-mir-26a	52.79
VAMP1	hsa-mir-765	58.01
VAMP1	hsa-mir-1260	59.07
VAMP3	hsa-mir-30a	51.82
VANGL2	hsa-mir-26a	49.97
VASP	hsa-mir-26a	60.52
VCPIP1	hsa-mir-1285	51.57
VCPIP1	hsa-mir-664	55.11
VPS13C	hsa-mir-26a	50.17
VPS25	hsa-mir-299-5p	49.97
VPS37D	hsa-mir-765	49.42
VPS4A	hsa-mir-1260	57.75
VPS4A	hsa-mir-665	69.92
VTI1A	hsa-mir-576-3p	50.75
WBP5	hsa-mir-1260	49.24
WDFY3	hsa-mir-1260	62.05
WDR20	hsa-mir-664	51.84
WDR20	hsa-mir-665	57.12
WDR22	hsa-mir-34b	53.62
WDR33	hsa-mir-665	58.11
WDR37	hsa-mir-1285	55.87
WDR47	hsa-mir-30a	49.38
WEE1	hsa-mir-26a	51.09
WHSC1L1	hsa-mir-765	50.91
WIBG	hsa-mir-1260	48.36
WNK3	hsa-mir-26a	59.19
WTAP	hsa-mir-1285	49.63
WWC1	hsa-mir-1285	53.64
WWC2	hsa-mir-1285	62.25
XPO7	hsa-mir-1260	51.59
XYLT1	hsa-mir-18a	57.65
YBX2	hsa-mir-765	50.89
YBX2	hsa-mir-665	54.05
YOD1	hsa-mir-30a	55.08
YTHDF1	hsa-mir-1285	56.46
YTHDF2	hsa-mir-765	64.98
YTHDF3	hsa-mir-765	62.01
YWHAE	hsa-mir-765	58.13
YWHAG	hsa-mir-34b	48.43
YWHAG	hsa-mir-765	59.82
ZAK	hsa-mir-18a	49.2
ZBTB4	hsa-mir-18a	50.66
ZBTB4	hsa-mir-665	61.83
ZBTB6	hsa-mir-1260	59.78
ZBTB7B	hsa-mir-765	72.83
ZC3H10	hsa-mir-1285	58.54
ZC3H11A	hsa-mir-1285	55.04
ZC3H12C	hsa-mir-765	51.86
ZC3H6	hsa-mir-34b	54.16
ZCCHC14	hsa-mir-30a	48.25
ZCCHC2	hsa-mir-665	65.86
ZDHHC17	hsa-mir-30a	54.57
ZDHHC18	hsa-mir-26a	52.63
ZDHHC6	hsa-mir-26a	56.8
ZDHHC9	hsa-mir-299-5p	48.89
ZDHHC9	hsa-mir-765	68.18
ZF	hsa-mir-26a	50.35
ZFP90	hsa-mir-664	50.1
ZHX1	hsa-mir-34b	49.47
ZIC1	hsa-mir-1260	62.41
ZIC2	hsa-mir-765	69.16
ZIC5	hsa-mir-576-3p	48.54
ZMYND11	hsa-mir-765	50.8
ZMYND11	hsa-mir-664	51.45
ZNF238	hsa-mir-26a	56.06
ZNF273	hsa-mir-1285	72.33
ZNF275	hsa-mir-26a	55.18
ZNF322A	hsa-mir-1285	57.86
ZNF365	hsa-mir-18a	53.96
ZNF410	hsa-mir-26a	55.88
ZNF516	hsa-mir-26a	57.99
ZNF521	hsa-mir-30a	48.86
ZNF544	hsa-mir-1260	56.15
ZNF554	hsa-mir-1285	61.47
ZNF594	hsa-mir-30a	50.04
ZNF6	hsa-mir-30a	53.44
ZNF607	hsa-mir-765	53.44
ZNF609	hsa-mir-665	57.16
ZNF644	hsa-mir-30a	49.54
ZNF651	hsa-mir-18a	65.97
ZNF655	hsa-mir-664	52.54
ZNF664	hsa-mir-34b	61.35
ZNF704	hsa-mir-18a	49.58
ZNRF1	hsa-mir-30a	54.52
ZNRF1	hsa-mir-1285	54.91
ZYG11B	hsa-mir-576-3p	54.18
